# Supplementary material for: Wide Riparian Zones Inhibited Trace Element Loss in Mining Wastelands by Reducing Surface Runoff and Trace Elements in Sediment
Source: MDPI journal article supplement (doi:10.3390/toxics12040279), 2024-04-11
Supplement: s1 [file s1]

## Article

# Wide Riparian Zones Inhibited Trace Element Loss in Mining Wastelands by Reducing Surface Runoff and Trace Elements in Sediment

Jiangdi Deng <sup>1,†</sup>, Zuran Li <sup>2,†</sup>, Bo Li <sup>3</sup>, Cui Xu <sup>1</sup>, Lei Wang <sup>3</sup> and Yuan Li <sup>3,\*</sup>

<sup>1</sup> Faculty of Animal Science and Technology, Yunnan Agricultural University, Kunming 650201, China; dengjd.cn@gmail.com (J.D.); cuixu0415@126.com (C.X.)

<sup>2</sup> College of Horticulture and Landscape, Yunnan Agricultural University, Kunming 650201, China; lizuran@foxmail.com

<sup>3</sup> College of Resources and Environment, Yunnan Agricultural University, Kunming 650201, China; libo@ynau.edu.cn (B.L.); wanglei.ko@foxmail.com (L.W.)

\* Correspondence: liyuan@ynau.edu.cn

† These authors contributed equally to this work.

**Citation:** Deng, J.; Li, Z.; Li, B.; Xu, C.; Wang, L.; Li, Y. Wide Riparian Zones Inhibited Trace Element Loss in Mining Wastelands by Reducing Surface Runoff and Trace Elements in Sediment. *Toxics* **2024**, *12*, x. <https://doi.org/10.3390/xxxxx>

Academic Editor: Ezio Ranieri

Received: 4 March 2024

Revised: 5 April 2024

Accepted: 8 April 2024

Published: date

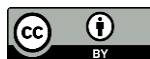

**Copyright:** © 2024 by the authors. Licensee MDPI, Basel, Switzerland. This article is an open access article distributed under the terms and conditions of the Creative Commons Attribution (CC BY) license (<https://creativecommons.org/licenses/by/4.0/>).

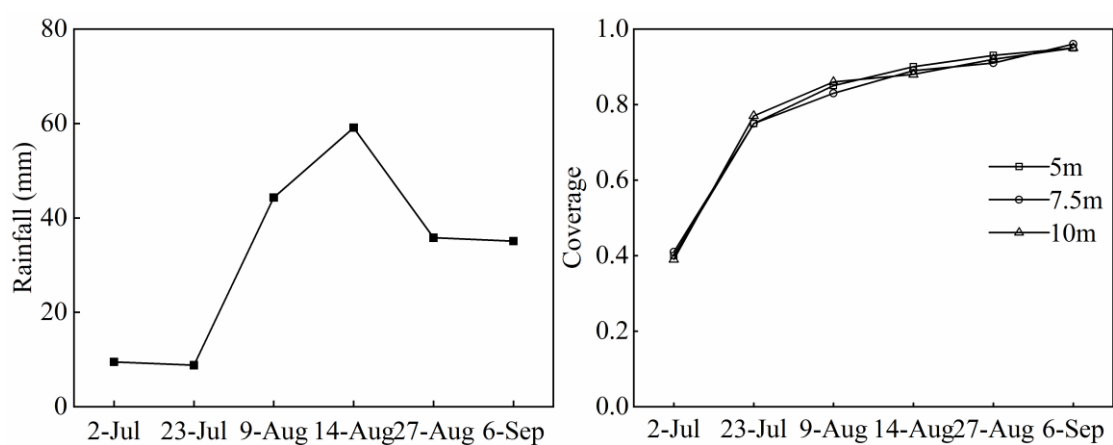

Figure S1. Rainfall characteristics and riparian zone coverage.

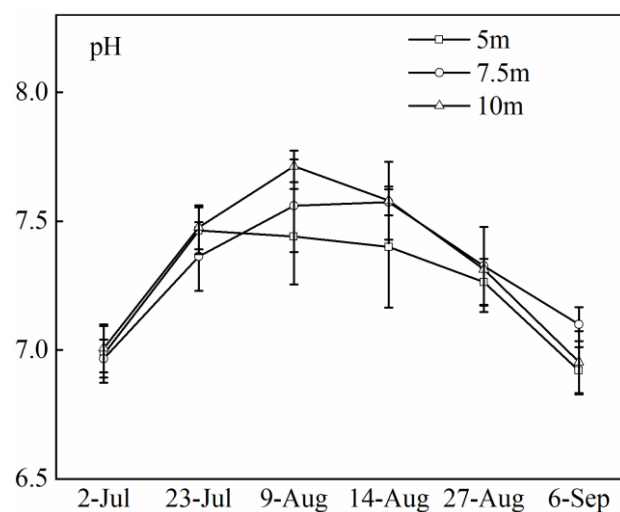

Figure S2. pH of runoff.

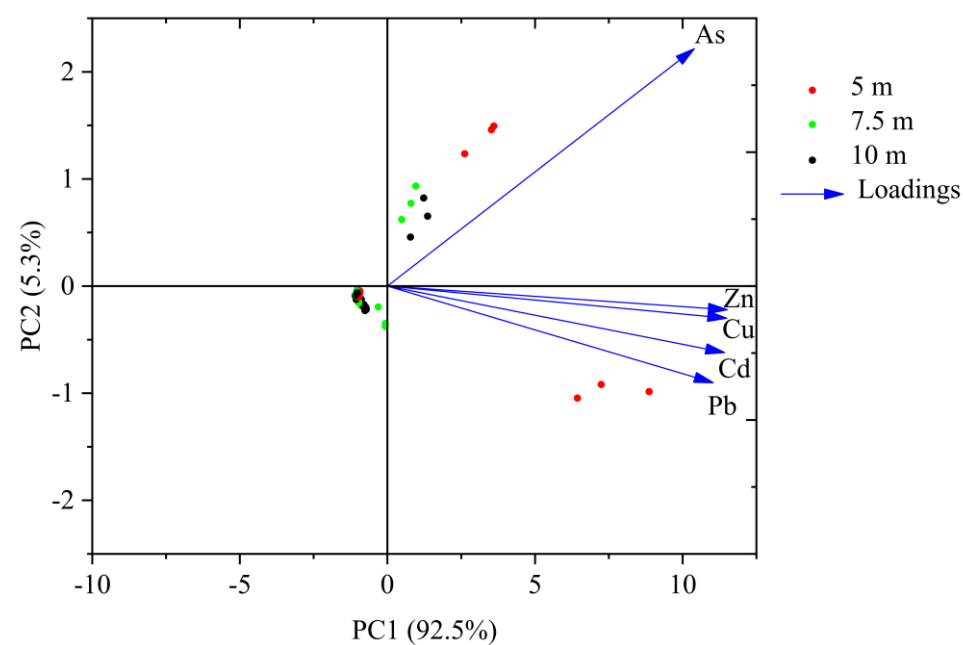

Figure S3. Scatter diagram of principal component analysis.

---

**Disclaimer/Publisher's Note:** The statements, opinions and data contained in all publications are solely those of the individual author(s) and contributor(s) and not of MDPI and/or the editor(s). MDPI and/or the editor(s) disclaim responsibility for any injury to people or property resulting from any ideas, methods, instructions or products referred to in the content.
